# Supplementary material for: Physical Pretreatments Applied in Three Commercial Kits for the Extraction of High-Quality DNA from Activated Sewage Sludge
Source: MDPI journal article supplement (doi:10.3390/ijms242015243), 2023-10-17
Supplement: s1 [file s1]

Supplementary material:

Supplementary Table 1: Genomic DNA obtained with the extraction kit Soil (Nucleospin® Soil) from Macherey-Nagek. REF: 7407780.50 by default and the results obtained with the pre-treatments proven.

| ID | Biomass (mg) | Qubit concentration (ng $\mu\text{l}^{-1}$ ) |               |             |                    |                    |                    | Average DNA concentration (ng $\mu\text{l}^{-1}$ ) | Average biomass (mg) | Concentration (ng $\mu\text{l}^{-1}$ ) in 100 mg biomass | Quality 160/280 | Average 260/280 |
|----|--------------|----------------------------------------------|---------------|-------------|--------------------|--------------------|--------------------|----------------------------------------------------|----------------------|----------------------------------------------------------|-----------------|-----------------|
|    |              | Default (kit)                                | 80°C x 90 min | UB x 90 min | UB + 80°C x 30 min | UB + 80°C x 60 min | UB + 80°C x 90 min |                                                    |                      |                                                          |                 |                 |
| 1  | 166.1        | 0.178                                        |               |             |                    |                    |                    | 0.249                                              | 194.2                | 0.128                                                    | 1.642           | 1.522           |
| 2  | 228.2        | 0.318                                        |               |             |                    |                    |                    |                                                    |                      |                                                          | 1.506           |                 |
| 3  | 188.4        | 0.25                                         |               |             |                    |                    |                    |                                                    |                      |                                                          | 1.420           |                 |
| 4  | 194.7        |                                              | 13.7          |             |                    |                    |                    | 12.800                                             | 163.4                | 0.732                                                    | 1.617           | 1.647           |
| 5  | 152.7        |                                              | 14.4          |             |                    |                    |                    |                                                    |                      |                                                          | 1.664           |                 |
| 6  | 142.7        |                                              | 10.3          |             |                    |                    |                    |                                                    |                      |                                                          | 1.660           |                 |
| 7  | 164.5        |                                              |               | 0.346       |                    |                    |                    | 0.361                                              | 162.9                | 0.222                                                    | 1.846           | 1.848           |
| 8  | 170          |                                              |               | 0.448       |                    |                    |                    |                                                    |                      |                                                          | 1.833           |                 |
| 9  | 154.2        |                                              |               | 0.29        |                    |                    |                    |                                                    |                      |                                                          | 1.865           |                 |
| 10 | 144.7        |                                              |               |             | 0.878              |                    |                    | 1.009                                              | 137.8                | 0.732                                                    | 1.617           | 1.647           |
| 11 | 132.9        |                                              |               |             | 1.1                |                    |                    |                                                    |                      |                                                          | 1.664           |                 |
| 12 | 135.9        |                                              |               |             | 1.05               |                    |                    |                                                    |                      |                                                          | 1.660           |                 |
| 13 | 146.5        |                                              |               |             |                    | 21.8               |                    | 22.933                                             | 143.8                | 15.952                                                   | 1.826           | 1.831           |
| 14 | 150.9        |                                              |               |             |                    | 22                 |                    |                                                    |                      |                                                          | 1.820           |                 |
| 15 | 133.9        |                                              |               |             |                    | 25                 |                    |                                                    |                      |                                                          | 1.847           |                 |
| 16 | 138.6        |                                              |               |             |                    |                    | 31.6               | 22.733                                             | 146.4                | 15.525                                                   | 1.558           | 1.550           |
| 17 | 117.3        |                                              |               |             |                    |                    | 14.6               |                                                    |                      |                                                          | 1.468           |                 |
| 18 | 183.4        |                                              |               |             |                    |                    | 22                 |                                                    |                      |                                                          | 1.625           |                 |

Supplementary Table 2: Genomic DNA obtained with the extraction kit DNEasy® PowerSoil® from Qiagen. REF: 12888-100 by default and the results obtained with the pre-treatments proven.

|    |              | Qubit concentration (ng $\mu\text{l}^{-1}$ ) |               |             |                    |                    |                    |                                                    |                      |                                                          |                 |                 |
|----|--------------|----------------------------------------------|---------------|-------------|--------------------|--------------------|--------------------|----------------------------------------------------|----------------------|----------------------------------------------------------|-----------------|-----------------|
| ID | Biomass (mg) | Default (kit)                                | 80°C x 90 min | UB x 90 min | UB + 80°C x 30 min | UB + 80°C x 60 min | UB + 80°C x 90 min | Average DNA concentration (ng $\mu\text{l}^{-1}$ ) | Average biomass (mg) | Concentration (ng $\mu\text{l}^{-1}$ ) in 100 mg biomass | Quality 160/280 | Average 260/280 |
| 19 | 145          | Not det.                                     |               |             |                    |                    |                    | 0.000                                              | 166.0                | 0.000                                                    | 1.368           | 1.475           |
| 20 | 155.4        | Not det.                                     |               |             |                    |                    |                    |                                                    |                      |                                                          | 1.582           |                 |
| 21 | 197.5        | Not det.                                     |               |             |                    |                    |                    |                                                    |                      |                                                          | 1.475           |                 |
| 22 | 178.2        |                                              | 15.2          |             |                    |                    |                    | 14.433                                             | 138.3                | 10.436                                                   | 1.827           | 1.858           |
| 23 | 135.5        |                                              | 14.9          |             |                    |                    |                    |                                                    |                      |                                                          | 1.871           |                 |
| 24 | 101.2        |                                              | 13.2          |             |                    |                    |                    |                                                    |                      |                                                          | 1.878           |                 |
| 25 | 113.5        |                                              |               | Not det.    |                    |                    |                    | 0.000                                              | 153.5                | 0.000                                                    | 1.400           | 1.415           |
| 26 | 178.8        |                                              |               | Not det.    |                    |                    |                    |                                                    |                      |                                                          | 1.301           |                 |
| 27 | 168.1        |                                              |               | Not det.    |                    |                    |                    |                                                    |                      |                                                          | 1.545           |                 |
| 28 | 138.6        |                                              |               |             | 2.5                |                    |                    | 3.467                                              | 140.0                | 2.477                                                    | 1.694           | 1.613           |
| 29 | 138.8        |                                              |               |             | 4.4                |                    |                    |                                                    |                      |                                                          | 1.739           |                 |
| 30 | 142.5        |                                              |               |             | 3.5                |                    |                    |                                                    |                      |                                                          | 1.408           |                 |
| 31 | 145.2        |                                              |               |             |                    | 25.8               |                    | 27.133                                             | 154.3                | 17.581                                                   | 1.871           | 1.859           |
| 32 | 146.7        |                                              |               |             |                    | 27.6               |                    |                                                    |                      |                                                          | 1.849           |                 |
| 33 | 171.1        |                                              |               |             |                    | 28                 |                    |                                                    |                      |                                                          | 1.858           |                 |
| 34 | 113.7        |                                              |               |             |                    |                    | 22.6               | 20.800                                             | 123.8                | 16.806                                                   | 1.891           | 1.876           |
| 35 | 117.4        |                                              |               |             |                    |                    | 24.8               |                                                    |                      |                                                          | 1.872           |                 |
| 36 | 140.2        |                                              |               |             |                    |                    | 15                 |                                                    |                      |                                                          | 1.865           |                 |

Supplementary Table 3: Genomic DNA obtained with the extraction kit E.Z.N.A.® Plant DNA Kit from Omega BIO-TEK. REF: D3485-01 by default and the results obtained with the pre-treatments proven.

| ID | Biomass (mg) | Qubit concentration (ng $\mu\text{l}^{-1}$ ) |               |             |                    |                    |                   | Average DNA concentration (ng $\mu\text{l}^{-1}$ ) | Average biomass (mg) | Concentration (ng $\mu\text{l}^{-1}$ ) in 100 mg biomass | Quality 160/280 | Average 260/280 |
|----|--------------|----------------------------------------------|---------------|-------------|--------------------|--------------------|-------------------|----------------------------------------------------|----------------------|----------------------------------------------------------|-----------------|-----------------|
|    |              | Default (kit)                                | 80°C x 90 min | UB x 90 min | UB + 80°C x 30 min | UB + 80°C x 60 min | UB +80°C x 90 min |                                                    |                      |                                                          |                 |                 |
| 19 | 95.3         | 0.178                                        |               |             |                    |                    |                   | 0.249                                              | 155.8                | 0.160                                                    | 1.578           | 1.610           |
| 20 | 186          | 0.318                                        |               |             |                    |                    |                   |                                                    |                      |                                                          | 1.623           |                 |
| 21 | 186.2        | 0.25                                         |               |             |                    |                    |                   |                                                    |                      |                                                          | 1.628           |                 |
| 22 | 113.3        |                                              | 104           |             |                    |                    |                   | 96.267                                             | 122.2                | 78.778                                                   | 2.001           | 2.023           |
| 23 | 118.9        |                                              | 86            |             |                    |                    |                   |                                                    |                      |                                                          | 2.038           |                 |
| 24 | 134.4        |                                              | 98.8          |             |                    |                    |                   |                                                    |                      |                                                          | 2.030           |                 |
| 25 | 125          |                                              |               | 0.696       |                    |                    |                   | 1.272                                              | 121.6                | 1.046                                                    | 1.645           | 1.661           |
| 26 | 125.2        |                                              |               | 1.21        |                    |                    |                   |                                                    |                      |                                                          | 1.646           |                 |
| 27 | 114.5        |                                              |               | 1.91        |                    |                    |                   |                                                    |                      |                                                          | 1.692           |                 |
| 28 | 145.5        |                                              |               |             | 30.4               |                    |                   | 63.133                                             | 143.3                | 44.067                                                   | 1.927           | 1.997           |
| 29 | 151.2        |                                              |               |             | 77.6               |                    |                   |                                                    |                      |                                                          | 2.031           |                 |
| 30 | 133.1        |                                              |               |             | 81.4               |                    |                   |                                                    |                      |                                                          | 2.033           |                 |
| 31 | 139.3        |                                              |               |             |                    | 80.2               |                   | 52.533                                             | 146.7                | 35.818                                                   | 2.036           | 2.038           |
| 32 | 132.3        |                                              |               |             |                    | 37.8               |                   |                                                    |                      |                                                          | 2.047           |                 |
| 33 | 168.4        |                                              |               |             |                    | 39.6               |                   |                                                    |                      |                                                          | 2.032           |                 |
| 34 | 149.8        |                                              |               |             |                    |                    | 91.6              | 89.400                                             | 166.0                | 53.866                                                   | 2.053           | 2.045           |
| 35 | 173.3        |                                              |               |             |                    |                    | 91                |                                                    |                      |                                                          | 2.043           |                 |
| 36 | 174.8        |                                              |               |             |                    |                    | 85.6              |                                                    |                      |                                                          | 2.040           |                 |
